# Supplementary material for: A new species of Phosocephala Townsend, 1908 (Diptera: Tachinidae) from Area de Conservación Guanacaste in northwestern Costa Rica
Source: PubMed Central journal article supplement (PMC4867709; doi:10.3897/bdj.4.e7863), 2016-04-25

# BOLD TaxonID Tree

Title : SEARCH: Tax(Phosocephala) [SEARCH1]  
Date : 15-January-2016  
Data Type : Nucleotide  
Distance Model : Kimura 2 Parameter  
Marker : COI-5P  
Codon Positions : 1st, 2nd, 3rd  
Labels : Extra Info, SampleID, ProcessID  
Filters : Length > 200  
Colorization : [blue]=Stop Codons [red]=Contamination or misidentification

Sequence Count : 5  
Species count : 2  
Genus count : 1  
Family count : 1  
Unidentified : 0

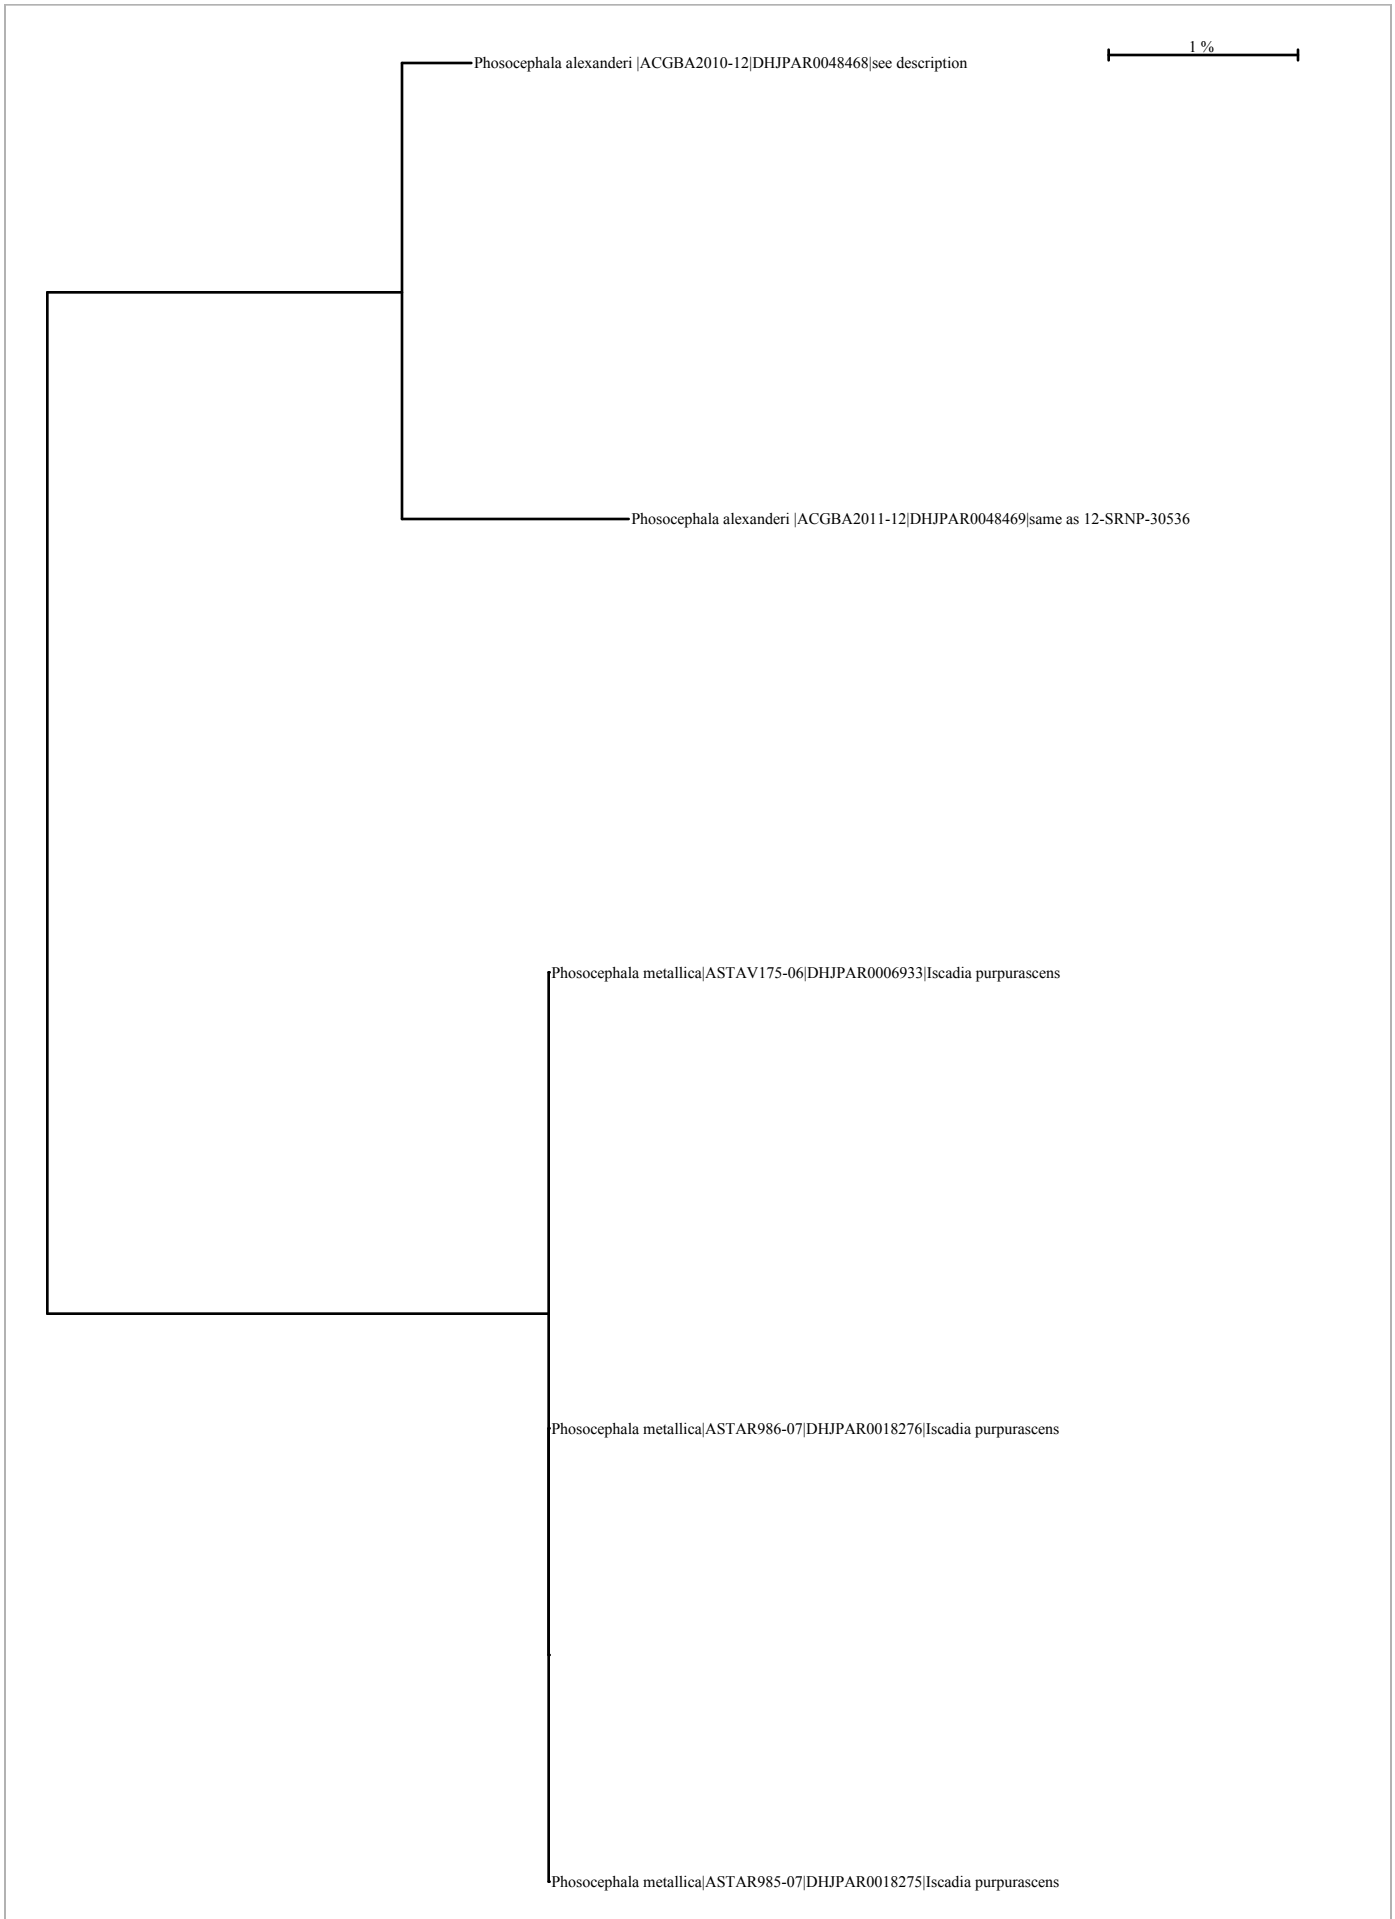

Supplement: biodiversity_data_journal-4-e7863-s001.pdf [file biodiversity_data_journal-4-e7863-s001.pdf]
